# Supplementary material for: The structure of the lanthanide aquo ions in solution as studied by 17O NMR spectroscopy and DFT calculations
Source: Royal Society of Chemistry journal article supplement (doi:10.1039/b714801a), 2007-11-22
Supplement: b714801a.pdf [file b714801a.pdf]

**Supplementary Information**  
**for**

**The structure of the lanthanide aquo ions in solution as studied by  $^{17}\text{O}$   
NMR spectroscopy and DFT calculations**

**Kristina Djanashvili,\* Carlos Platas-Iglesias and Joop A. Peters**

**1. Cartesian coordinates ( $\text{\AA}$ ) for the  $\text{Ln}(\text{H}_2\text{O})_8^{3+}$  and  $\text{Ln}(\text{H}_2\text{O})_9^{3+}$  systems obtained  
by DFT calculations**

**$\text{Ce}(\text{H}_2\text{O})_8^{3+}$**

| Center<br>Number | Atomic<br>Number | Coordinates (Angstroms) |           |           |
|------------------|------------------|-------------------------|-----------|-----------|
|                  |                  | X                       | Y         | Z         |
| 1                | 58               | -0.000352               | 0.000166  | -0.002459 |
| 2                | 8                | -1.079352               | -1.845423 | -1.368377 |
| 3                | 8                | -1.869574               | 1.074147  | -1.340060 |
| 4                | 8                | 1.048657                | 1.868119  | -1.364916 |
| 5                | 8                | 1.843440                | -1.064582 | -1.379690 |
| 6                | 8                | 2.078466                | 0.557967  | 1.341134  |
| 7                | 8                | 0.579242                | -2.060646 | 1.359633  |
| 8                | 8                | -2.048098               | -0.576698 | 1.375876  |
| 9                | 8                | -0.548703               | 2.045147  | 1.390395  |
| 10               | 1                | 0.910803                | 2.838213  | -1.251627 |
| 11               | 1                | 1.698559                | 1.766498  | -2.099507 |
| 12               | 1                | -2.840701               | 0.948506  | -1.221572 |
| 13               | 1                | -1.761883               | 1.746183  | -2.053873 |
| 14               | 1                | -1.756789               | -1.724685 | -2.074445 |
| 15               | 1                | -0.948425               | -2.818461 | -1.274855 |
| 16               | 1                | 1.721387                | -1.722447 | -2.104571 |
| 17               | 1                | 2.816798                | -0.943474 | -1.276141 |
| 18               | 1                | -2.432366               | -0.031228 | 2.102061  |
| 19               | 1                | -2.648805               | -1.351204 | 1.265886  |
| 20               | 1                | 0.030628                | -2.452781 | 2.079159  |
| 21               | 1                | 1.360015                | -2.653594 | 1.253186  |
| 22               | 1                | 2.477181                | -0.000818 | 2.049002  |
| 23               | 1                | 2.676768                | 1.334140  | 1.230466  |
| 24               | 1                | -1.329808               | 2.641123  | 1.304728  |
| 25               | 1                | 0.014440                | 2.430170  | 2.102763  |

**$\text{Ce}(\text{H}_2\text{O})_9^{3+}$**

| Center<br>Number | Atomic<br>Number | Coordinates (Angstroms) |           |           |
|------------------|------------------|-------------------------|-----------|-----------|
|                  |                  | X                       | Y         | Z         |
| 1                | 58               | 0.000660                | 0.000736  | 0.001091  |
| 2                | 8                | -1.852251               | -1.782329 | 0.156033  |
| 3                | 8                | 1.837718                | 1.041012  | 1.470762  |
| 4                | 8                | -1.850532               | 1.037240  | 1.460321  |
| 5                | 8                | 1.852951                | 0.746296  | -1.624189 |
| 6                | 8                | -1.835187               | 0.749575  | -1.642582 |
| 7                | 8                | 1.845007                | -1.788023 | 0.170955  |
| 8                | 1                | -2.652698               | 1.253629  | -1.428050 |
| 9                | 1                | -1.968660               | 0.375962  | -2.542707 |
| 10               | 1                | -2.670245               | 0.592785  | 1.774608  |

Electronic Supplementary Information for Dalton Transactions  
This journal is © The Royal Society of Chemistry 2007

|    |   |           |           |           |
|----|---|-----------|-----------|-----------|
| 11 | 1 | -1.994409 | 2.001969  | 1.587180  |
| 12 | 1 | -2.011376 | -2.360087 | 0.935969  |
| 13 | 1 | -2.661840 | -1.838614 | -0.400535 |
| 14 | 1 | 2.661833  | -1.750342 | 0.718440  |
| 15 | 1 | 1.983165  | -2.510518 | -0.482073 |
| 16 | 1 | 1.979781  | 0.835892  | 2.422243  |
| 17 | 1 | 2.657955  | 1.485708  | 1.158094  |
| 18 | 1 | 1.996662  | 1.669874  | -1.930432 |
| 19 | 1 | 2.669995  | 0.248625  | -1.854685 |
| 20 | 8 | 0.001540  | 2.570525  | -0.238270 |
| 21 | 8 | 0.006155  | -1.492975 | -2.097450 |
| 22 | 8 | -0.006737 | -1.083220 | 2.340304  |
| 23 | 1 | -0.533414 | -2.303519 | -2.241218 |
| 24 | 1 | 0.547806  | -1.370713 | -2.909988 |
| 25 | 1 | -0.547767 | -0.811318 | 3.116284  |
| 26 | 1 | 0.521121  | -1.862592 | 2.628252  |
| 27 | 1 | 0.527380  | 3.213705  | 0.289618  |
| 28 | 1 | -0.532905 | 3.102072  | -0.871362 |

Pr (H<sub>2</sub>O)<sub>8</sub><sup>3+</sup>

| Center Number | Atomic Number | Coordinates (Angstroms) |           |           |
|---------------|---------------|-------------------------|-----------|-----------|
|               |               | X                       | Y         | Z         |
| 1             | 59            | -0.000107               | -0.000268 | -0.003303 |
| 2             | 8             | -1.118276               | -1.798919 | -1.357562 |
| 3             | 8             | -1.813996               | 1.117356  | -1.342140 |
| 4             | 8             | 1.102977                | 1.813983  | -1.354888 |
| 5             | 8             | 1.802954                | -1.112660 | -1.360073 |
| 6             | 8             | 2.067162                | 0.494925  | 1.342486  |
| 7             | 8             | 0.504202                | -2.055698 | 1.356456  |
| 8             | 8             | -2.054078               | -0.505136 | 1.359562  |
| 9             | 8             | -0.488964               | 2.046097  | 1.375942  |
| 10            | 1             | 0.995157                | 2.788494  | -1.246931 |
| 11            | 1             | 1.752889                | 1.686101  | -2.085295 |
| 12            | 1             | -2.788868               | 1.020467  | -1.228130 |
| 13            | 1             | -1.680533               | 1.781294  | -2.058683 |
| 14            | 1             | -1.785908               | -1.654910 | -2.068873 |
| 15            | 1             | -1.019117               | -2.775482 | -1.261122 |
| 16            | 1             | 1.663815                | -1.764053 | -2.087285 |
| 17            | 1             | 2.778914                | -1.019756 | -1.251944 |
| 18            | 1             | -2.421743               | 0.059067  | 2.079756  |
| 19            | 1             | -2.676368               | -1.262660 | 1.252197  |
| 20            | 1             | -0.062991               | -2.425935 | 2.073076  |
| 21            | 1             | 1.266897                | -2.672954 | 1.257033  |
| 22            | 1             | 2.442450                | -0.074325 | 2.054865  |
| 23            | 1             | 2.688371                | 1.253179  | 1.233803  |
| 24            | 1             | -1.250181               | 2.666631  | 1.286434  |
| 25            | 1             | 0.087666                | 2.411056  | 2.087727  |

Pr (H<sub>2</sub>O)<sub>9</sub><sup>3+</sup>

| Center Number | Atomic Number | Coordinates (Angstroms) |           |           |
|---------------|---------------|-------------------------|-----------|-----------|
|               |               | X                       | Y         | Z         |
| 1             | 59            | -0.000031               | -0.001238 | 0.000276  |
| 2             | 8             | -1.842475               | 0.714999  | -1.609600 |

Electronic Supplementary Information for Dalton Transactions  
 This journal is © The Royal Society of Chemistry 2007

|    |   |           |           |           |
|----|---|-----------|-----------|-----------|
| 3  | 8 | 1.854849  | -1.753548 | 0.173469  |
| 4  | 8 | -1.804652 | -1.796935 | 0.157929  |
| 5  | 8 | 1.810465  | 1.054940  | 1.452871  |
| 6  | 8 | -1.839392 | 1.008261  | 1.445466  |
| 7  | 8 | 1.827444  | 0.763838  | -1.606853 |
| 8  | 1 | -2.638290 | 0.551168  | 1.794716  |
| 9  | 1 | -1.985596 | 1.972250  | 1.578999  |
| 10 | 1 | -2.603855 | -1.883347 | -0.410561 |
| 11 | 1 | -1.935372 | -2.403275 | 0.921974  |
| 12 | 1 | -1.978721 | 0.348084  | -2.512547 |
| 13 | 1 | -2.660313 | 1.212972  | -1.381303 |
| 14 | 1 | 2.637448  | 0.267850  | -1.865165 |
| 15 | 1 | 1.949149  | 1.687650  | -1.923601 |
| 16 | 1 | 2.009495  | -2.480451 | -0.471775 |
| 17 | 1 | 2.661834  | -1.701532 | 0.735269  |
| 18 | 1 | 1.944087  | 0.875869  | 2.411411  |
| 19 | 1 | 2.609498  | 1.539195  | 1.142706  |
| 20 | 8 | 0.005122  | -1.062842 | 2.322830  |
| 21 | 8 | -0.036107 | 2.547067  | -0.247323 |
| 22 | 8 | 0.025326  | -1.469165 | -2.088669 |
| 23 | 1 | -0.618367 | 3.070042  | -0.844680 |
| 24 | 1 | 0.530419  | 3.193424  | 0.232167  |
| 25 | 1 | -0.533133 | -2.260882 | -2.261146 |
| 26 | 1 | 0.601159  | -1.352098 | -2.877977 |
| 27 | 1 | 0.579036  | -1.799368 | 2.632922  |
| 28 | 1 | -0.571316 | -0.817443 | 3.081376  |

**Nd(H<sub>2</sub>O)<sub>8</sub><sup>3+</sup>**

| Center<br>Number | Atomic<br>Number | Coordinates (Angstroms) |           |           |
|------------------|------------------|-------------------------|-----------|-----------|
|                  |                  | X                       | Y         | Z         |
| 1                | 60               | 0.000091                | -0.000265 | -0.002972 |
| 2                | 8                | -1.119265               | -1.782403 | -1.350234 |
| 3                | 8                | -1.792531               | 1.120369  | -1.339004 |
| 4                | 8                | 1.111119                | 1.788456  | -1.349332 |
| 5                | 8                | 1.783244                | -1.117906 | -1.351246 |
| 6                | 8                | 2.052588                | 0.479178  | 1.342476  |
| 7                | 8                | 0.482213                | -2.042681 | 1.353496  |
| 8                | 8                | -2.043921               | -0.484421 | 1.352090  |
| 9                | 8                | -0.473928               | 2.038755  | 1.362021  |
| 10               | 1                | 1.041761                | 2.764049  | -1.220533 |
| 11               | 1                | 1.715122                | 1.647352  | -2.116812 |
| 12               | 1                | -2.766973               | 1.070896  | -1.194386 |
| 13               | 1                | -1.650783               | 1.730811  | -2.100551 |
| 14               | 1                | -1.721291               | -1.633855 | -2.116868 |
| 15               | 1                | -1.066925               | -2.758594 | -1.218932 |
| 16               | 1                | 1.634741                | -1.716287 | -2.120877 |
| 17               | 1                | 2.759309                | -1.063666 | -1.221032 |
| 18               | 1                | -2.369827               | 0.048829  | 2.114433  |
| 19               | 1                | -2.696504               | -1.211700 | 1.218286  |
| 20               | 1                | -0.056724               | -2.370646 | 2.111272  |
| 21               | 1                | 1.213995                | -2.691696 | 1.227441  |
| 22               | 1                | 2.384498                | -0.058466 | 2.099068  |
| 23               | 1                | 2.706391                | 1.204741  | 1.204616  |
| 24               | 1                | -1.202502               | 2.691833  | 1.238028  |
| 25               | 1                | 0.074119                | 2.367532  | 2.113035  |

**Nd (H<sub>2</sub>O)<sub>9</sub><sup>3+</sup>**

| Center<br>Number | Atomic<br>Number | Coordinates (Angstroms) |           |           |
|------------------|------------------|-------------------------|-----------|-----------|
|                  |                  | X                       | Y         | Z         |
| 1                | 60               | -0.001330               | 0.001368  | -0.001611 |
| 2                | 8                | 1.752875                | 0.287898  | -1.811318 |
| 3                | 8                | -1.772094               | 1.360776  | 1.203432  |
| 4                | 8                | 1.798117                | 1.406271  | 1.116545  |
| 5                | 8                | -1.771839               | -1.705006 | 0.620946  |
| 6                | 8                | 1.790091                | -1.688483 | 0.623698  |
| 7                | 8                | -1.790632               | 0.342410  | -1.767972 |
| 8                | 1                | 2.613411                | -1.498892 | 1.130499  |
| 9                | 1                | 1.974357                | -2.497822 | 0.095430  |
| 10               | 1                | 2.606534                | 1.764824  | 0.684308  |
| 11               | 1                | 2.001464                | 1.350429  | 2.077975  |
| 12               | 1                | 1.948338                | 1.155376  | -2.234448 |
| 13               | 1                | 2.566265                | -0.257554 | -1.915806 |
| 14               | 1                | -2.598345               | 0.898602  | -1.674124 |
| 15               | 1                | -1.997050               | -0.327415 | -2.458136 |
| 16               | 1                | -1.977350               | 2.299628  | 0.988748  |
| 17               | 1                | -2.576291               | 0.995311  | 1.639158  |
| 18               | 1                | -1.953015               | -1.982224 | 1.547048  |
| 19               | 1                | -2.586716               | -1.914641 | 0.109219  |
| 20               | 8                | 0.045682                | -0.431467 | 2.505813  |
| 21               | 8                | -0.021541               | -1.944234 | -1.636781 |
| 22               | 8                | -0.011313               | 2.391972  | -0.867316 |
| 23               | 1                | 0.482431                | -2.006938 | -2.480131 |
| 24               | 1                | -0.520991               | -2.787973 | -1.542876 |
| 25               | 1                | 0.492509                | 3.149923  | -0.491422 |
| 26               | 1                | -0.535850               | 2.749267  | -1.619028 |
| 27               | 1                | -0.479371               | 0.035140  | 3.194937  |
| 28               | 1                | 0.542552                | -1.145502 | 2.966985  |

**Sm (H<sub>2</sub>O)<sub>8</sub><sup>3+</sup>**

| Center<br>Number | Atomic<br>Number | Coordinates (Angstroms) |           |           |
|------------------|------------------|-------------------------|-----------|-----------|
|                  |                  | X                       | Y         | Z         |
| 1                | 62               | -0.000197               | -0.000714 | -0.003169 |
| 2                | 8                | -0.498275               | -2.008983 | -1.331567 |
| 3                | 8                | -2.017701               | 0.499503  | -1.319586 |
| 4                | 8                | 0.489179                | 2.015175  | -1.327571 |
| 5                | 8                | 2.012074                | -0.499250 | -1.325500 |
| 6                | 8                | 1.771495                | 1.078546  | 1.321727  |
| 7                | 8                | 1.076677                | -1.763886 | 1.331837  |
| 8                | 8                | -1.763654               | -1.078979 | 1.332474  |
| 9                | 8                | -1.067837               | 1.760084  | 1.340455  |
| 10               | 1                | 0.082537                | 2.907726  | -1.227204 |
| 11               | 1                | 1.146899                | 2.087644  | -2.057954 |
| 12               | 1                | -2.916040               | 0.107919  | -1.210949 |
| 13               | 1                | -2.089316               | 1.178513  | -2.030412 |
| 14               | 1                | -1.160275               | -2.072918 | -2.059524 |
| 15               | 1                | -0.093895               | -2.903347 | -1.238369 |
| 16               | 1                | 2.076982                | -1.163500 | -2.050826 |
| 17               | 1                | 2.910226                | -0.105471 | -1.222433 |

Electronic Supplementary Information for Dalton Transactions  
This journal is © The Royal Society of Chemistry 2007

|    |   |           |           |          |
|----|---|-----------|-----------|----------|
| 18 | 1 | -2.286427 | -0.646349 | 2.047415 |
| 19 | 1 | -2.119868 | -1.993254 | 1.234178 |
| 20 | 1 | 0.640837  | -2.292763 | 2.040429 |
| 21 | 1 | 1.992343  | -2.116836 | 1.237160 |
| 22 | 1 | 2.301486  | 0.645800  | 2.031222 |
| 23 | 1 | 2.123728  | 1.994236  | 1.223529 |
| 24 | 1 | -1.985837 | 2.109782  | 1.256433 |
| 25 | 1 | -0.626837 | 2.289418  | 2.045655 |

---

**Sm (H<sub>2</sub>O)<sub>9</sub><sup>3+</sup>**

| Center<br>Number | Atomic<br>Number | Coordinates (Angstroms) |           |           |
|------------------|------------------|-------------------------|-----------|-----------|
|                  |                  | X                       | Y         | Z         |
| 1                | 62               | 0.003001                | 0.007459  | -0.000305 |
| 2                | 8                | 1.724803                | 0.282473  | -1.799959 |
| 3                | 8                | -1.759388               | 1.335925  | 1.189505  |
| 4                | 8                | 1.776372                | 1.389581  | 1.109014  |
| 5                | 8                | -1.744503               | -1.684375 | 0.611176  |
| 6                | 8                | 1.768016                | -1.659721 | 0.618976  |
| 7                | 8                | -1.741981               | 0.351780  | -1.764058 |
| 8                | 1                | 2.603390                | -1.450513 | 1.097476  |
| 9                | 1                | 1.955703                | -2.454569 | 0.069409  |
| 10               | 1                | 2.597778                | 1.720735  | 0.677850  |
| 11               | 1                | 1.987329                | 1.280786  | 2.064527  |
| 12               | 1                | 1.932541                | 1.150783  | -2.213839 |
| 13               | 1                | 2.532165                | -0.271718 | -1.906889 |
| 14               | 1                | -2.575164               | 0.866590  | -1.658492 |
| 15               | 1                | -1.932810               | -0.345415 | -2.433078 |
| 16               | 1                | -1.962795               | 2.278601  | 0.993743  |
| 17               | 1                | -2.569529               | 0.962813  | 1.607802  |
| 18               | 1                | -1.931050               | -1.920508 | 1.548887  |
| 19               | 1                | -2.573745               | -1.867532 | 0.111703  |
| 20               | 8                | 0.052743                | -0.410220 | 2.483820  |
| 21               | 8                | -0.013514               | -1.934874 | -1.608954 |
| 22               | 8                | -0.003398               | 2.369624  | -0.851226 |
| 23               | 1                | 0.464571                | -1.983861 | -2.467958 |
| 24               | 1                | -0.521383               | -2.772414 | -1.515758 |
| 25               | 1                | 0.474655                | 3.142621  | -0.474365 |
| 26               | 1                | -0.554134               | 2.708992  | -1.593023 |
| 27               | 1                | -0.488257               | 0.052164  | 3.162997  |
| 28               | 1                | 0.519482                | -1.144163 | 2.944787  |

---

**Eu (H<sub>2</sub>O)<sub>8</sub><sup>3+</sup>**

| Center<br>Number | Atomic<br>Number | Coordinates (Angstroms) |           |           |
|------------------|------------------|-------------------------|-----------|-----------|
|                  |                  | X                       | Y         | Z         |
| 1                | 63               | 0.000278                | -0.000446 | -0.003776 |
| 2                | 8                | -1.183821               | -1.687791 | -1.317723 |
| 3                | 8                | -1.706999               | 1.178922  | -1.303398 |

Electronic Supplementary Information for Dalton Transactions  
This journal is © The Royal Society of Chemistry 2007

|    |   |           |           |           |
|----|---|-----------|-----------|-----------|
| 4  | 8 | 1.162756  | 1.699722  | -1.325905 |
| 5  | 8 | 1.684704  | -1.179061 | -1.327128 |
| 6  | 8 | 2.035755  | 0.372192  | 1.304333  |
| 7  | 8 | 0.378987  | -2.018228 | 1.324065  |
| 8  | 8 | -2.014182 | -0.376018 | 1.332604  |
| 9  | 8 | -0.358678 | 2.011377  | 1.339256  |
| 10 | 1 | 1.113363  | 2.678233  | -1.211403 |
| 11 | 1 | 1.791219  | 1.535097  | -2.067528 |
| 12 | 1 | -2.684476 | 1.142492  | -1.177156 |
| 13 | 1 | -1.538558 | 1.823901  | -2.029894 |
| 14 | 1 | -1.833706 | -1.505308 | -2.036491 |
| 15 | 1 | -1.140653 | -2.667877 | -1.215388 |
| 16 | 1 | 1.500727  | -1.817270 | -2.055917 |
| 17 | 1 | 2.664447  | -1.145785 | -1.218922 |
| 18 | 1 | -2.337073 | 0.208213  | 2.058193  |
| 19 | 1 | -2.683887 | -1.092027 | 1.223463  |
| 20 | 1 | -0.206411 | -2.345308 | 2.046781  |
| 21 | 1 | 1.100270  | -2.682704 | 1.219322  |
| 22 | 1 | 2.374074  | -0.216537 | 2.019284  |
| 23 | 1 | 2.706586  | 1.084854  | 1.182290  |
| 24 | 1 | -1.074915 | 2.682813  | 1.242932  |
| 25 | 1 | 0.243286  | 2.336383  | 2.049504  |

---

**Eu (H<sub>2</sub>O)<sub>9</sub><sup>3+</sup>**

| Center<br>Number | Atomic<br>Number | Coordinates (Angstroms) |           |           |
|------------------|------------------|-------------------------|-----------|-----------|
|                  |                  | X                       | Y         | Z         |
| 1                | 63               | -0.004227               | -0.005467 | -0.006169 |
| 2                | 8                | 1.694238                | 0.284694  | -1.809767 |
| 3                | 8                | -1.756658               | 1.328205  | 1.156291  |
| 4                | 8                | 1.769164                | 1.351739  | 1.092791  |
| 5                | 8                | -1.724014               | -1.691060 | 0.616797  |
| 6                | 8                | 1.755629                | -1.650129 | 0.627021  |
| 7                | 8                | -1.739818               | 0.349262  | -1.759613 |
| 8                | 1                | 2.591850                | -1.426911 | 1.097627  |
| 9                | 1                | 1.944247                | -2.457033 | 0.096010  |
| 10               | 1                | 2.578283                | 1.703648  | 0.654693  |
| 11               | 1                | 1.989228                | 1.253345  | 2.047189  |
| 12               | 1                | 1.898464                | 1.162285  | -2.205147 |
| 13               | 1                | 2.508109                | -0.260311 | -1.916324 |
| 14               | 1                | -2.555078               | 0.890400  | -1.644525 |
| 15               | 1                | -1.953278               | -0.322112 | -2.446883 |
| 16               | 1                | -1.946544               | 2.269000  | 0.938312  |
| 17               | 1                | -2.575681               | 0.967877  | 1.568248  |
| 18               | 1                | -1.913616               | -1.903208 | 1.559497  |
| 19               | 1                | -2.543926               | -1.905631 | 0.114423  |
| 20               | 8                | 0.027890                | -0.414456 | 2.469033  |
| 21               | 8                | -0.006486               | -1.936250 | -1.594320 |
| 22               | 8                | 0.005933                | 2.360177  | -0.825439 |
| 23               | 1                | 0.468783                | -1.977300 | -2.455384 |
| 24               | 1                | -0.501359               | -2.781895 | -1.502445 |
| 25               | 1                | 0.487917                | 3.111166  | -0.410196 |
| 26               | 1                | -0.540714               | 2.736832  | -1.551900 |
| 27               | 1                | -0.469142               | 0.082989  | 3.157199  |
| 28               | 1                | 0.531703                | -1.118810 | 2.936751  |

---

**Gd(H<sub>2</sub>O)<sub>8</sub><sup>3+</sup>**

| Center<br>Number | Atomic<br>Number | Coordinates (Angstroms) |           |           |
|------------------|------------------|-------------------------|-----------|-----------|
|                  |                  | X                       | Y         | Z         |
| 1                | 64               | -0.000178               | -0.007026 | -0.000713 |
| 2                | 8                | 2.063382                | -0.193111 | 1.286011  |
| 3                | 8                | 0.167144                | 2.022989  | 1.323195  |
| 4                | 8                | -2.075271               | 0.193453  | 1.262628  |
| 5                | 8                | -0.184508               | -2.004189 | 1.364217  |
| 6                | 8                | -1.571875               | -1.325229 | -1.305560 |
| 7                | 8                | 1.302675                | -1.559624 | -1.343912 |
| 8                | 8                | 1.592153                | 1.324369  | -1.274915 |
| 9                | 8                | -1.298166               | 1.580253  | -1.313120 |
| 10               | 1                | -2.792673               | 0.850975  | 1.102753  |
| 11               | 1                | -2.385219               | -0.389709 | 1.994163  |
| 12               | 1                | 0.827344                | 2.749038  | 1.225843  |
| 13               | 1                | -0.446762               | 2.290876  | 2.046649  |
| 14               | 1                | 2.348811                | 0.387935  | 2.029296  |
| 15               | 1                | 2.779018                | -0.859794 | 1.158585  |
| 16               | 1                | 0.459526                | -2.276874 | 2.058975  |
| 17               | 1                | -0.830545               | -2.743506 | 1.269960  |
| 18               | 1                | 1.376991                | 1.971061  | -1.987156 |
| 19               | 1                | 2.563452                | 1.388657  | -1.116933 |
| 20               | 1                | 1.974124                | -1.300164 | -2.017794 |
| 21               | 1                | 1.352034                | -2.540967 | -1.257048 |
| 22               | 1                | -1.347483               | -1.928760 | -2.051877 |
| 23               | 1                | -2.549320               | -1.374531 | -1.184392 |
| 24               | 1                | -1.342867               | 2.557162  | -1.185750 |
| 25               | 1                | -1.939298               | 1.356999  | -2.027968 |

**Gd(H<sub>2</sub>O)<sub>9</sub><sup>3+</sup>**

| Center<br>Number | Atomic<br>Number | Coordinates (Angstroms) |           |           |
|------------------|------------------|-------------------------|-----------|-----------|
|                  |                  | X                       | Y         | Z         |
| 1                | 64               | -0.000529               | -0.002103 | -0.004245 |
| 2                | 8                | 1.695405                | 0.273912  | -1.784751 |
| 3                | 8                | -1.730895               | 1.320888  | 1.167177  |
| 4                | 8                | 1.747369                | 1.362436  | 1.092158  |
| 5                | 8                | -1.732916               | -1.663554 | 0.597733  |
| 6                | 8                | 1.746598                | -1.646586 | 0.608221  |
| 7                | 8                | -1.715589               | 0.352821  | -1.758697 |
| 8                | 1                | 2.580523                | -1.432304 | 1.087406  |
| 9                | 1                | 1.936316                | -2.448621 | 0.070018  |
| 10               | 1                | 2.555753                | 1.721469  | 0.658882  |
| 11               | 1                | 1.961438                | 1.283262  | 2.049416  |
| 12               | 1                | 1.881799                | 1.151883  | -2.188213 |
| 13               | 1                | 2.520635                | -0.255996 | -1.877589 |
| 14               | 1                | -2.540930               | 0.879484  | -1.648400 |
| 15               | 1                | -1.920302               | -0.339846 | -2.426933 |
| 16               | 1                | -1.936000               | 2.263365  | 0.971924  |
| 17               | 1                | -2.533022               | 0.949788  | 1.602308  |
| 18               | 1                | -1.917657               | -1.899823 | 1.535084  |
| 19               | 1                | -2.559454               | -1.852538 | 0.095822  |
| 20               | 8                | 0.020809                | -0.441860 | 2.453962  |

Electronic Supplementary Information for Dalton Transactions  
This journal is © The Royal Society of Chemistry 2007

|    |   |           |           |           |
|----|---|-----------|-----------|-----------|
| 21 | 8 | -0.030083 | -1.918161 | -1.592593 |
| 22 | 8 | 0.015854  | 2.341903  | -0.851925 |
| 23 | 1 | 0.477299  | -1.987723 | -2.432463 |
| 24 | 1 | -0.513474 | -2.767825 | -1.480993 |
| 25 | 1 | 0.453592  | 3.114258  | -0.427869 |
| 26 | 1 | -0.544304 | 2.697935  | -1.578355 |
| 27 | 1 | -0.449937 | 0.072099  | 3.148915  |
| 28 | 1 | 0.552599  | -1.127519 | 2.917771  |

**Tb (H<sub>2</sub>O)<sub>8</sub><sup>3+</sup>**

| Center<br>Number | Atomic<br>Number | Coordinates (Angstroms) |           |           |
|------------------|------------------|-------------------------|-----------|-----------|
|                  |                  | X                       | Y         | Z         |
| 1                | 65               | 0.000166                | -0.000306 | -0.002929 |
| 2                | 8                | -0.594120               | -1.951715 | -1.299854 |
| 3                | 8                | -1.964264               | 0.588816  | -1.282160 |
| 4                | 8                | 0.570452                | 1.954923  | -1.307875 |
| 5                | 8                | 1.945642                | -0.587882 | -1.312960 |
| 6                | 8                | 1.802426                | 0.975611  | 1.283078  |
| 7                | 8                | 0.983437                | -1.784439 | 1.304833  |
| 8                | 8                | -1.784120               | -0.974346 | 1.307561  |
| 9                | 8                | -0.960207               | 1.787866  | 1.312420  |
| 10               | 1                | 0.219484                | 2.868282  | -1.185197 |
| 11               | 1                | 1.241303                | 2.003303  | -2.028262 |
| 12               | 1                | -2.871872               | 0.215087  | -1.188440 |
| 13               | 1                | -2.006565               | 1.270754  | -1.992605 |
| 14               | 1                | -1.301422               | -1.999645 | -1.984754 |
| 15               | 1                | -0.227527               | -2.862174 | -1.203978 |
| 16               | 1                | 1.994210                | -1.302869 | -1.989807 |
| 17               | 1                | 2.860413                | -0.236356 | -1.202872 |
| 18               | 1                | -2.276660               | -0.528469 | 2.035723  |
| 19               | 1                | -2.170364               | -1.876508 | 1.211107  |
| 20               | 1                | 0.534386                | -2.295857 | 2.017799  |
| 21               | 1                | 1.887530                | -2.165284 | 1.205460  |
| 22               | 1                | 2.308379                | 0.525938  | 1.999534  |
| 23               | 1                | 2.177860                | 1.882787  | 1.192471  |
| 24               | 1                | -1.867539               | 2.165457  | 1.231200  |
| 25               | 1                | -0.506342               | 2.284748  | 2.032705  |

**Tb (H<sub>2</sub>O)<sub>9</sub><sup>3+</sup>**

| Center<br>Number | Atomic<br>Number | Coordinates (Angstroms) |           |           |
|------------------|------------------|-------------------------|-----------|-----------|
|                  |                  | X                       | Y         | Z         |
| 1                | 65               | 0.000256                | -0.000103 | 0.000150  |
| 2                | 8                | -1.759827               | 0.718281  | -1.556767 |
| 3                | 8                | 1.740779                | -1.724547 | 0.173035  |
| 4                | 8                | -1.771385               | -1.699287 | 0.166053  |
| 5                | 8                | 1.768317                | 0.987502  | 1.392551  |
| 6                | 8                | -1.763522               | 1.013321  | 1.382685  |
| 7                | 8                | 1.781406                | 0.689517  | -1.542333 |



Electronic Supplementary Information for Dalton Transactions  
 This journal is © The Royal Society of Chemistry 2007

|    |   |           |           |           |
|----|---|-----------|-----------|-----------|
| 8  | 1 | -2.567208 | 0.568699  | 1.735911  |
| 9  | 1 | -1.853827 | 1.973355  | 1.576702  |
| 10 | 1 | -2.562456 | -1.789280 | -0.412458 |
| 11 | 1 | -1.865057 | -2.356745 | 0.891511  |
| 12 | 1 | -1.854543 | 0.419273  | -2.488992 |
| 13 | 1 | -2.554465 | 1.257740  | -1.342181 |
| 14 | 1 | 2.571510  | 0.165984  | -1.807217 |
| 15 | 1 | 1.885111  | 1.589054  | -1.926611 |
| 16 | 1 | 1.825453  | -2.507315 | -0.416714 |
| 17 | 1 | 2.537926  | -1.707814 | 0.750057  |
| 18 | 1 | 1.855730  | 0.880258  | 2.366404  |
| 19 | 1 | 2.566788  | 1.470267  | 1.080157  |
| 20 | 8 | -0.012074 | -1.012621 | 2.259074  |
| 21 | 8 | 0.020456  | 2.462460  | -0.253235 |
| 22 | 8 | -0.006048 | -1.432961 | -2.019449 |
| 23 | 1 | -0.553448 | 2.992342  | -0.851188 |
| 24 | 1 | 0.601939  | 3.096034  | 0.223954  |
| 25 | 1 | -0.579461 | -2.214923 | -2.183648 |
| 26 | 1 | 0.581376  | -1.337063 | -2.802145 |
| 27 | 1 | 0.555367  | -1.751803 | 2.573536  |
| 28 | 1 | -0.592165 | -0.754673 | 3.010288  |

**Dy (H<sub>2</sub>O)<sub>8</sub><sup>3+</sup>**

| Center<br>Number | Atomic<br>Number | Coordinates (Angstroms) |           |           |
|------------------|------------------|-------------------------|-----------|-----------|
|                  |                  | X                       | Y         | Z         |
| 1                | 66               | 0.000587                | -0.000581 | -0.002447 |
| 2                | 8                | 0.998577                | -1.766750 | -1.293376 |
| 3                | 8                | -1.771556               | -1.007315 | -1.280997 |
| 4                | 8                | -1.010674               | 1.756241  | -1.297905 |
| 5                | 8                | 1.764049                | 0.999573  | -1.292789 |
| 6                | 8                | 0.537154                | 1.962896  | 1.282331  |
| 7                | 8                | 1.956717                | -0.530344 | 1.293779  |
| 8                | 8                | -0.530873               | -1.951484 | 1.300601  |
| 9                | 8                | -1.946511               | 0.540202  | 1.302190  |
| 10               | 1                | -1.919835               | 2.120986  | -1.184548 |
| 11               | 1                | -0.582055               | 2.277421  | -2.016149 |
| 12               | 1                | -2.151059               | -1.909524 | -1.162679 |
| 13               | 1                | -2.300158               | -0.563334 | -1.984324 |
| 14               | 1                | 0.558171                | -2.280082 | -2.010283 |
| 15               | 1                | 1.909333                | -2.131364 | -1.195001 |
| 16               | 1                | 2.288668                | 0.553444  | -1.998000 |
| 17               | 1                | 2.144262                | 1.901934  | -1.177763 |
| 18               | 1                | -1.208918               | -2.002456 | 2.014058  |
| 19               | 1                | -0.149350               | -2.855728 | 1.203421  |
| 20               | 1                | 2.014062                | -1.222977 | 1.992676  |
| 21               | 1                | 2.862155                | -0.155469 | 1.185349  |
| 22               | 1                | 1.214344                | 2.020539  | 1.995795  |
| 23               | 1                | 0.155229                | 2.865864  | 1.177585  |
| 24               | 1                | -2.853006               | 0.163378  | 1.207409  |
| 25               | 1                | -1.995621               | 1.231547  | 2.003278  |

**Dy (H<sub>2</sub>O)<sub>9</sub><sup>3+</sup>**

| Center | Atomic | Coordinates (Angstroms) |  |  |
|--------|--------|-------------------------|--|--|
|--------|--------|-------------------------|--|--|

Electronic Supplementary Information for Dalton Transactions  
 This journal is © The Royal Society of Chemistry 2007

| Number | Number | X         | Y         | Z         |
|--------|--------|-----------|-----------|-----------|
| 1      | 66     | -0.000919 | -0.001498 | 0.000452  |
| 2      | 8      | 1.728481  | 0.298594  | -1.699308 |
| 3      | 8      | -1.723870 | 1.312152  | 1.127876  |
| 4      | 8      | 1.751387  | 1.315034  | 1.080194  |
| 5      | 8      | -1.741910 | -1.607688 | 0.600351  |
| 6      | 8      | 1.760073  | -1.606046 | 0.564593  |
| 7      | 8      | -1.771302 | 0.292543  | -1.657426 |
| 8      | 1      | 2.564876  | -1.421015 | 1.099868  |
| 9      | 1      | 1.890393  | -2.484732 | 0.141523  |
| 10     | 1      | 2.547355  | 1.700385  | 0.648718  |
| 11     | 1      | 1.884486  | 1.390082  | 2.052019  |
| 12     | 1      | 1.849474  | 1.110734  | -2.239316 |
| 13     | 1      | 2.532937  | -0.254620 | -1.823279 |
| 14     | 1      | -2.573767 | 0.856106  | -1.573207 |
| 15     | 1      | -1.899811 | -0.281033 | -2.446033 |
| 16     | 1      | -1.851604 | 2.280674  | 1.014671  |
| 17     | 1      | -2.522905 | 0.965486  | 1.585603  |
| 18     | 1      | -1.851935 | -2.016239 | 1.488058  |
| 19     | 1      | -2.554236 | -1.811106 | 0.083528  |
| 20     | 8      | 0.029360  | -0.442146 | 2.426169  |
| 21     | 8      | -0.019934 | -1.883245 | -1.592227 |
| 22     | 8      | -0.011828 | 2.312807  | -0.851969 |
| 23     | 1      | 0.547938  | -1.977562 | -2.389635 |
| 24     | 1      | -0.586663 | -2.685473 | -1.544291 |
| 25     | 1      | 0.552272  | 3.053637  | -0.535245 |
| 26     | 1      | -0.591262 | 2.674440  | -1.559267 |
| 27     | 1      | -0.525350 | -0.003371 | 3.109570  |
| 28     | 1      | 0.609163  | -1.085854 | 2.891780  |

$\text{Ho}(\text{H}_2\text{O})_8^{3+}$

| Center Number | Atomic Number | Coordinates (Angstroms) |           |           |
|---------------|---------------|-------------------------|-----------|-----------|
|               |               | X                       | Y         | Z         |
| 1             | 67            | 0.000687                | -0.000194 | -0.002289 |
| 2             | 8             | 1.256094                | -1.575719 | -1.286696 |
| 3             | 8             | -1.575144               | -1.271367 | -1.277202 |
| 4             | 8             | -1.279068               | 1.568359  | -1.280573 |
| 5             | 8             | 1.571025                | 1.261305  | -1.289640 |
| 6             | 8             | 0.220261                | 2.008205  | 1.277563  |
| 7             | 8             | 2.006039                | -0.210169 | 1.284102  |
| 8             | 8             | -0.209813               | -1.997669 | 1.293869  |
| 9             | 8             | -1.991376               | 0.213424  | 1.304598  |
| 10            | 1             | -2.240860               | 1.761619  | -1.179915 |
| 11            | 1             | -0.943138               | 2.157097  | -1.995960 |
| 12            | 1             | -1.786368               | -2.228626 | -1.171121 |
| 13            | 1             | -2.194593               | -0.912839 | -1.954880 |
| 14            | 1             | 0.900061                | -2.160193 | -1.995996 |
| 15            | 1             | 2.218916                | -1.772868 | -1.206992 |
| 16            | 1             | 2.155975                | 0.903153  | -1.997616 |
| 17            | 1             | 1.787920                | 2.218324  | -1.192617 |
| 18            | 1             | -0.877941               | -2.155760 | 2.001202  |
| 19            | 1             | 0.317027                | -2.826365 | 1.204259  |
| 20            | 1             | 2.181988                | -0.903005 | 1.962727  |
| 21            | 1             | 2.838772                | 0.306963  | 1.177541  |
| 22            | 1             | 0.902572                | 2.176337  | 1.968794  |
| 23            | 1             | -0.291226               | 2.844007  | 1.167922  |

Electronic Supplementary Information for Dalton Transactions  
This journal is © The Royal Society of Chemistry 2007

|    |   |           |           |          |
|----|---|-----------|-----------|----------|
| 24 | 1 | -2.828896 | -0.296926 | 1.201604 |
| 25 | 1 | -2.170389 | 0.931110  | 1.956222 |

-----

**Ho (H<sub>2</sub>O)<sub>9</sub><sup>3+</sup>**

-----

| Center<br>Number | Atomic<br>Number | Coordinates (Angstroms) |           |           |
|------------------|------------------|-------------------------|-----------|-----------|
|                  |                  | X                       | Y         | Z         |
| 1                | 67               | -0.000175               | 0.000315  | 0.000041  |
| 2                | 8                | 1.729116                | 0.296474  | -1.684330 |
| 3                | 8                | -1.725994               | 1.302064  | 1.114864  |
| 4                | 8                | 1.748245                | 1.304934  | 1.068947  |
| 5                | 8                | -1.741138               | -1.588611 | 0.595542  |
| 6                | 8                | 1.756121                | -1.589573 | 0.557153  |
| 7                | 8                | -1.771780               | 0.287381  | -1.642492 |
| 8                | 1                | 2.554591                | -1.410004 | 1.103985  |
| 9                | 1                | 1.880110                | -2.474006 | 0.146116  |
| 10               | 1                | 2.538028                | 1.701213  | 0.635544  |
| 11               | 1                | 1.873170                | 1.396606  | 2.040217  |
| 12               | 1                | 1.842204                | 1.095491  | -2.246506 |
| 13               | 1                | 2.525908                | -0.266784 | -1.812521 |
| 14               | 1                | -2.568854               | 0.857706  | -1.554332 |
| 15               | 1                | -1.897933               | -0.266968 | -2.445142 |
| 16               | 1                | -1.847090               | 2.273779  | 1.023195  |
| 17               | 1                | -2.518880               | 0.951778  | 1.580712  |
| 18               | 1                | -1.849256               | -2.022064 | 1.471753  |
| 19               | 1                | -2.544651               | -1.795360 | 0.066279  |
| 20               | 8                | 0.031316                | -0.442565 | 2.417807  |
| 21               | 8                | -0.016482               | -1.879860 | -1.582665 |
| 22               | 8                | -0.010738               | 2.306550  | -0.845746 |
| 23               | 1                | 0.559801                | -1.984530 | -2.372832 |
| 24               | 1                | -0.589870               | -2.677568 | -1.537340 |
| 25               | 1                | 0.561706                | 3.041766  | -0.530975 |
| 26               | 1                | -0.592963               | 2.673907  | -1.548332 |
| 27               | 1                | -0.525418               | -0.011620 | 3.104493  |
| 28               | 1                | 0.621803                | -1.078777 | 2.880336  |

-----

**Er (H<sub>2</sub>O)<sub>8</sub><sup>3+</sup>**

-----

| Center<br>Number | Atomic<br>Number | Coordinates (Angstroms) |           |           |
|------------------|------------------|-------------------------|-----------|-----------|
|                  |                  | X                       | Y         | Z         |
| 1                | 68               | -0.001608               | -0.001623 | 0.000869  |
| 2                | 8                | 0.528392                | -1.953694 | 1.248091  |
| 3                | 8                | 1.951401                | 0.499574  | 1.271806  |
| 4                | 8                | -0.501729               | 1.924252  | 1.306237  |
| 5                | 8                | -1.939320               | -0.536860 | 1.274485  |
| 6                | 8                | -1.750767               | 1.027218  | -1.244045 |
| 7                | 8                | -1.018081               | -1.704475 | -1.302703 |
| 8                | 8                | 1.741514                | -0.975924 | -1.281535 |
| 9                | 8                | 1.001979                | 1.727253  | -1.286053 |
| 10               | 1                | -0.089076               | 2.815481  | 1.216494  |
| 11               | 1                | -1.177978               | 1.991473  | 2.020182  |
| 12               | 1                | 2.846598                | 0.101601  | 1.156953  |

-----

Electronic Supplementary Information for Dalton Transactions  
This journal is © The Royal Society of Chemistry 2007

|    |   |           |           |           |
|----|---|-----------|-----------|-----------|
| 13 | 1 | 2.023799  | 1.180054  | 1.981105  |
| 14 | 1 | 1.211972  | -2.024751 | 1.954259  |
| 15 | 1 | 0.110217  | -2.842593 | 1.158185  |
| 16 | 1 | -1.997662 | -1.235608 | 1.967549  |
| 17 | 1 | -2.841228 | -0.151154 | 1.175228  |
| 18 | 1 | 2.265533  | -0.514348 | -1.977828 |
| 19 | 1 | 2.110671  | -1.886249 | -1.196737 |
| 20 | 1 | -0.575120 | -2.237333 | -2.003719 |
| 21 | 1 | -1.932366 | -2.060498 | -1.203797 |
| 22 | 1 | -2.294318 | 0.597021  | -1.944360 |
| 23 | 1 | -2.108679 | 1.937569  | -1.116994 |
| 24 | 1 | 1.912339  | 2.093078  | -1.184796 |
| 25 | 1 | 0.537563  | 2.287870  | -1.951056 |

-----  
**Er (H<sub>2</sub>O)<sub>9</sub><sup>3+</sup>**

| Center<br>Number | Atomic<br>Number | Coordinates (Angstroms) |           |           |
|------------------|------------------|-------------------------|-----------|-----------|
|                  |                  | X                       | Y         | Z         |
| 1                | 68               | -0.000093               | -0.000940 | -0.000066 |
| 2                | 8                | 1.715208                | 0.297177  | -1.680754 |
| 3                | 8                | -1.711784               | 1.298225  | 1.112999  |
| 4                | 8                | 1.734585                | 1.299461  | 1.070414  |
| 5                | 8                | -1.727540               | -1.585564 | 0.594408  |
| 6                | 8                | 1.743006                | -1.588024 | 0.555192  |
| 7                | 8                | -1.758953               | 0.288183  | -1.637259 |
| 8                | 1                | 2.553462                | -1.408974 | 1.083353  |
| 9                | 1                | 1.863912                | -2.466589 | 0.130521  |
| 10               | 1                | 2.533844                | 1.684149  | 0.644774  |
| 11               | 1                | 1.857933                | 1.380511  | 2.042632  |
| 12               | 1                | 1.828625                | 1.100197  | -2.235872 |
| 13               | 1                | 2.523420                | -0.251603 | -1.797961 |
| 14               | 1                | -2.561037               | 0.850651  | -1.546331 |
| 15               | 1                | -1.886729               | -0.269333 | -2.437097 |
| 16               | 1                | -1.835054               | 2.268309  | 1.010905  |
| 17               | 1                | -2.513128               | 0.951069  | 1.565963  |
| 18               | 1                | -1.834582               | -2.005801 | 1.476812  |
| 19               | 1                | -2.541289               | -1.784001 | 0.078309  |
| 20               | 8                | 0.031147                | -0.438807 | 2.407306  |
| 21               | 8                | -0.014500               | -1.873166 | -1.575080 |
| 22               | 8                | -0.011465               | 2.296708  | -0.846289 |
| 23               | 1                | 0.546561                | -1.968352 | -2.377310 |
| 24               | 1                | -0.569560               | -2.682957 | -1.516095 |
| 25               | 1                | 0.544223                | 3.040776  | -0.522618 |
| 26               | 1                | -0.581023               | 2.655337  | -1.563562 |
| 27               | 1                | -0.511220               | 0.006371  | 3.096522  |
| 28               | 1                | 0.602925                | -1.091969 | 2.869956  |

-----  
**Tm (H<sub>2</sub>O)<sub>8</sub><sup>3+</sup>**

| Center<br>Number | Atomic<br>Number | Coordinates (Angstroms) |           |           |
|------------------|------------------|-------------------------|-----------|-----------|
|                  |                  | X                       | Y         | Z         |
| 1                | 69               | -0.000749               | -0.002726 | -0.004666 |
| 2                | 8                | 0.848593                | -1.782960 | -1.301396 |
| 3                | 8                | -1.817738               | -0.922464 | -1.223972 |
| 4                | 8                | -0.857716               | 1.761559  | -1.323884 |

Electronic Supplementary Information for Dalton Transactions  
This journal is © The Royal Society of Chemistry 2007

|    |   |           |           |           |
|----|---|-----------|-----------|-----------|
| 5  | 8 | 1.813023  | 0.886421  | -1.247951 |
| 6  | 8 | 0.624483  | 1.851420  | 1.330430  |
| 7  | 8 | 1.922894  | -0.655236 | 1.226744  |
| 8  | 8 | -0.642122 | -1.821814 | 1.356182  |
| 9  | 8 | -1.900076 | 0.700550  | 1.228276  |
| 10 | 1 | -1.757732 | 2.159443  | -1.256217 |
| 11 | 1 | -0.390921 | 2.227522  | -2.056303 |
| 12 | 1 | -2.282048 | -1.769829 | -1.026918 |
| 13 | 1 | -2.345505 | -0.458057 | -1.915158 |
| 14 | 1 | 0.331061  | -2.299934 | -1.962366 |
| 15 | 1 | 1.727381  | -2.221344 | -1.211148 |
| 16 | 1 | 2.345345  | 0.396150  | -1.917593 |
| 17 | 1 | 2.257836  | 1.755172  | -1.106824 |
| 18 | 1 | -1.330704 | -1.782536 | 2.060781  |
| 19 | 1 | -0.297232 | -2.745610 | 1.338012  |
| 20 | 1 | 1.956915  | -1.332960 | 1.941629  |
| 21 | 1 | 2.852149  | -0.381921 | 1.042118  |
| 22 | 1 | 1.441743  | 1.877532  | 1.881188  |
| 23 | 1 | 0.361802  | 2.788765  | 1.169842  |
| 24 | 1 | -2.833950 | 0.424431  | 1.074686  |
| 25 | 1 | -1.915158 | 1.411479  | 1.910785  |

Tm(H<sub>2</sub>O)<sub>9</sub><sup>3+</sup>

| Center<br>Number | Atomic<br>Number | Coordinates (Angstroms) |           |           |
|------------------|------------------|-------------------------|-----------|-----------|
|                  |                  | X                       | Y         | Z         |
| 1                | 69               | 0.004317                | -0.000026 | -0.005980 |
| 2                | 8                | 1.639536                | 0.270117  | -1.758488 |
| 3                | 8                | -1.680073               | 1.299353  | 1.129154  |
| 4                | 8                | 1.700234                | 1.328893  | 1.063027  |
| 5                | 8                | -1.674693               | -1.621079 | 0.592503  |
| 6                | 8                | 1.690877                | -1.611709 | 0.590740  |
| 7                | 8                | -1.672304               | 0.338178  | -1.705075 |
| 8                | 1                | 2.522978                | -1.406444 | 1.076570  |
| 9                | 1                | 1.874582                | -2.410845 | 0.046694  |
| 10               | 1                | 2.523400                | 1.664891  | 0.638984  |
| 11               | 1                | 1.900496                | 1.219363  | 2.020507  |
| 12               | 1                | 1.814930                | 1.161652  | -2.136413 |
| 13               | 1                | 2.477601                | -0.240850 | -1.841494 |
| 14               | 1                | -2.511746               | 0.833436  | -1.560580 |
| 15               | 1                | -1.871648               | -0.361503 | -2.367623 |
| 16               | 1                | -1.879240               | 2.238667  | 0.913361  |
| 17               | 1                | -2.497826               | 0.927008  | 1.533182  |
| 18               | 1                | -1.860175               | -1.870127 | 1.526366  |
| 19               | 1                | -2.501732               | -1.797975 | 0.086928  |
| 20               | 8                | 0.046319                | -0.403529 | 2.421303  |
| 21               | 8                | -0.020696               | -1.880817 | -1.569398 |
| 22               | 8                | 0.030928                | 2.300847  | -0.845480 |
| 23               | 1                | 0.480778                | -1.934346 | -2.414306 |
| 24               | 1                | -0.493681               | -2.736265 | -1.458163 |
| 25               | 1                | 0.455242                | 3.069320  | -0.401105 |
| 26               | 1                | -0.537238               | 2.663753  | -1.561876 |
| 27               | 1                | -0.459094               | 0.091890  | 3.104451  |
| 28               | 1                | 0.518824                | -1.130807 | 2.885981  |

**Yb (H<sub>2</sub>O)<sub>8</sub><sup>3+</sup>**

| Center<br>Number | Atomic<br>Number | Coordinates (Angstroms) |           |           |
|------------------|------------------|-------------------------|-----------|-----------|
|                  |                  | X                       | Y         | Z         |
| 1                | 70               | -0.000274               | -0.000231 | -0.003444 |
| 2                | 8                | -1.729153               | 1.002197  | -1.252501 |
| 3                | 8                | 0.978362                | 1.727759  | -1.266338 |
| 4                | 8                | 1.741421                | -0.989801 | -1.245960 |
| 5                | 8                | -0.984649               | -1.703571 | -1.290119 |
| 6                | 8                | 0.520707                | -1.906143 | 1.274541  |
| 7                | 8                | -1.925927               | -0.547074 | 1.246351  |
| 8                | 8                | -0.524214               | 1.887708  | 1.299618  |
| 9                | 8                | 1.930783                | 0.518924  | 1.246298  |
| 10               | 1                | 2.705470                | -0.839003 | -1.104074 |
| 11               | 1                | 1.654254                | -1.608563 | -2.007705 |
| 12               | 1                | 0.839747                | 2.696856  | -1.148495 |
| 13               | 1                | 1.696771                | 1.616189  | -1.931792 |
| 14               | 1                | -1.617975               | 1.705554  | -1.933670 |
| 15               | 1                | -2.697831               | 0.878652  | -1.116122 |
| 16               | 1                | -1.676476               | -1.574854 | -1.980126 |
| 17               | 1                | -0.834306               | -2.674336 | -1.205295 |
| 18               | 1                | 0.036753                | 2.267066  | 2.016127  |
| 19               | 1                | -1.324463               | 2.459011  | 1.223560  |
| 20               | 1                | -2.332408               | 0.004825  | 1.954801  |
| 21               | 1                | -2.515985               | -1.325118 | 1.108797  |
| 22               | 1                | -0.063781               | -2.313529 | 1.956033  |
| 23               | 1                | 1.298639                | -2.501715 | 1.163636  |
| 24               | 1                | 2.492975                | 1.324845  | 1.165034  |
| 25               | 1                | 2.299177                | -0.019699 | 1.985250  |

**Yb (H<sub>2</sub>O)<sub>9</sub><sup>3+</sup>**

| Center<br>Number | Atomic<br>Number | Coordinates (Angstroms) |           |           |
|------------------|------------------|-------------------------|-----------|-----------|
|                  |                  | X                       | Y         | Z         |
| 1                | 70               | 0.000562                | -0.000400 | -0.002790 |
| 2                | 8                | 1.625010                | 0.277686  | -1.752860 |
| 3                | 8                | -1.679493               | 1.284377  | 1.134741  |
| 4                | 8                | 1.695839                | 1.317627  | 1.060372  |
| 5                | 8                | -1.659426               | -1.625649 | 0.586181  |
| 6                | 8                | 1.670969                | -1.608310 | 0.598406  |
| 7                | 8                | -1.659325               | 0.337917  | -1.701321 |
| 8                | 1                | 2.508132                | -1.400502 | 1.074517  |
| 9                | 1                | 1.852109                | -2.400867 | 0.043739  |
| 10               | 1                | 2.518519                | 1.643879  | 0.627270  |
| 11               | 1                | 1.906235                | 1.209878  | 2.015577  |
| 12               | 1                | 1.806778                | 1.169722  | -2.127134 |
| 13               | 1                | 2.459103                | -0.238673 | -1.842824 |
| 14               | 1                | -2.503559               | 0.826301  | -1.560785 |
| 15               | 1                | -1.850968               | -0.367692 | -2.360294 |
| 16               | 1                | -1.892476               | 2.212557  | 0.887420  |
| 17               | 1                | -2.499651               | 0.905518  | 1.527909  |
| 18               | 1                | -1.842847               | -1.840007 | 1.529429  |
| 19               | 1                | -2.495587               | -1.792871 | 0.092436  |
| 20               | 8                | 0.020662                | -0.411891 | 2.414799  |

|    |   |           |           |           |
|----|---|-----------|-----------|-----------|
| 21 | 8 | -0.014041 | -1.874633 | -1.564948 |
| 22 | 8 | 0.004107  | 2.300502  | -0.810757 |
| 23 | 1 | 0.473327  | -1.917723 | -2.418668 |
| 24 | 1 | -0.491865 | -2.728184 | -1.459920 |
| 25 | 1 | 0.481710  | 3.056509  | -0.400532 |
| 26 | 1 | -0.507282 | 2.659756  | -1.570554 |
| 27 | 1 | -0.445398 | 0.112516  | 3.104041  |
| 28 | 1 | 0.539752  | -1.106301 | 2.880321  |

-----

**2. listing of reference codes and literature references of crystal structures of Ln(H<sub>2</sub>O)<sub>8</sub><sup>3+</sup> ions in a SAP coordination polyhedron data retrieved from the Cambridge Crystallographic Data Base (see also main text, Table 3.**

| Ln | Reference Code | Literature reference                                                                                                                                                                 |
|----|----------------|--------------------------------------------------------------------------------------------------------------------------------------------------------------------------------------|
| Nd | YEGHIC         | Zhao-Xi Wang, Xiao-Fei Shen, Jun Wang, Peng Zhang, Yi-Zhi Li, E. N. Nfor, You Song, S. Ohkoshi, K. Hashimoto, Xiao-Zeng You, <i>Angew. Chem., Int. Ed.</i> , 2006, <b>45</b> , 3287. |
| Eu | JEDLIO         | S. J. Dalgarno, J. L. Atwood, C. L. Raston, <i>Cryst. Growth Des.</i> , 2006, <b>6</b> , 174.                                                                                        |
| Gd | SEYIF          | M. Hatano, E. Takagi, M. Arinobe, K. Ishihara, <i>J. Organomet. Chem.</i> , 2007, <b>692</b> , 569.                                                                                  |
| Tb | TAHDAI         | S. J. Dalgarno, M. J. Hardie, M. Makha, C. L. Raston, <i>Chem.-Eur. J.</i> , 2003, <b>9</b> , 2834.                                                                                  |
|    | XUMKEV         | J. L. Atwood, L. J. Barbour, S. Dalgarno, C. L. Raston, H. R. Webb <i>J. Chem.Soc., Dalton Trans.</i> , 2002, <b>23</b> , 4351.                                                      |
|    | YECSSO         | C. J. Kepert, B. W. Skelton, A. H. White, <i>Aust. J. Chem.</i> , 1994, <b>47</b> , 391.                                                                                             |
| Dy | FOPNAZ         | R. D. Rogers, <i>Inorg. Chim. Acta</i> , 1987, <b>133</b> , 347.                                                                                                                     |
| Yb | HOSFUQ         | F. J. Waller, A. G. M. Barrett, D. C. Braddock, D. Ramprasad, R. M. McKinnell, A. J. P. White, D. J. Williams, R. Ducray, <i>J. Org. Chem.</i> , 1999, <b>64</b> , 2910.             |
|    | IDIYEA         | A. Rohde, W. Urland <i>Acta Crystallogr., Sect. E: Struct. Rep. Online</i> , 2006, <b>62</b> , m1210.                                                                                |
|    | MEFMOA         | L. Cunha-Silva, A. Westcott, N. Whitford, M. J. Hardie, <i>Cryst. Growth Des.</i> 2006, <b>6</b> , 726.                                                                              |
| Lu | FOPPOP         | R. D. Rogers, E. J. Voss, <i>Inorg. Chim. Acta</i> , 1987, <b>133</b> , 181.                                                                                                         |
